# Supplementary material for: Environmental influences on quality features ofOviductus Ranaein the Changbai Mountains
Source: Royal Society of Chemistry journal article supplement (doi:10.1039/c9ra04823e), 2019-01-01
Supplement: c9ra04823e1.pdf [file c9ra04823e1.pdf]

## **Environmental influences on quality features of *Oviductus Ranae* in Changbai Mountains**

Yao Xiao,<sup>a</sup> Shuling Ni,<sup>a</sup> Shihan Wang,<sup>b</sup> Yuanshuai Gan,<sup>a</sup> Yan Zhou,<sup>a</sup> Hongye Guo,<sup>a</sup> Min Liu,<sup>a</sup> Zhihan Wang,<sup>c</sup> Yongsheng Wang<sup>a\*</sup>

*College of Pharmacy, Jilin University, Changchun, Jilin 130021, China;*

*College of Chinese Herbal Medicine, Jilin Agricultural University, Changchun, Jilin 130118, China*

*Department of Physical Sciences, Eastern New Mexico University, Portales, NM 88130, USA*

*Correspondence: mikewangwys@outlook.com or wys@jlu.edu.cn*

|                               |   |
|-------------------------------|---|
| 1. Relationship Diagrams..... | 2 |
|-------------------------------|---|

## 1. Relationship Diagrams

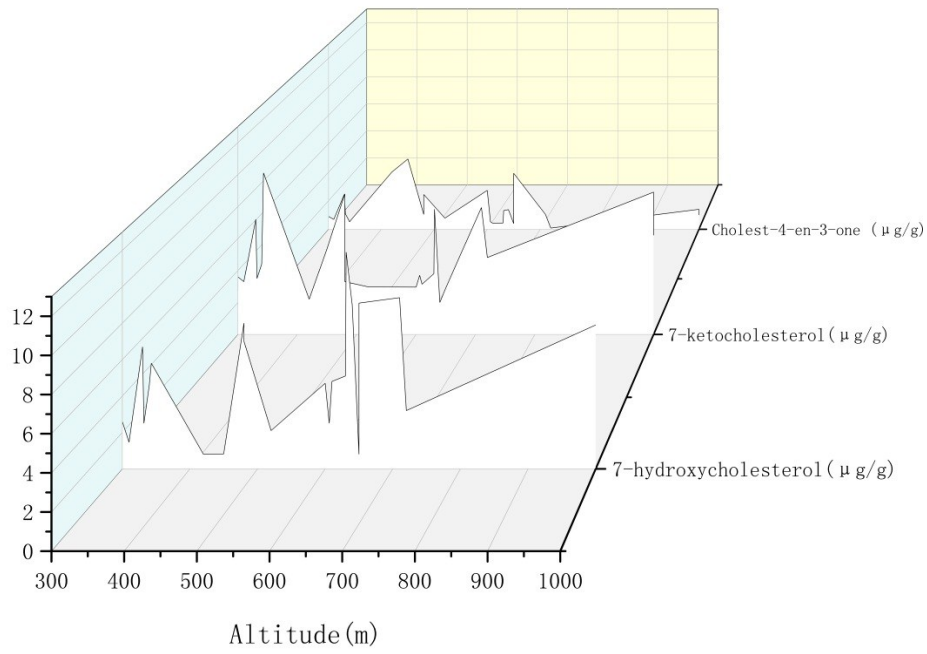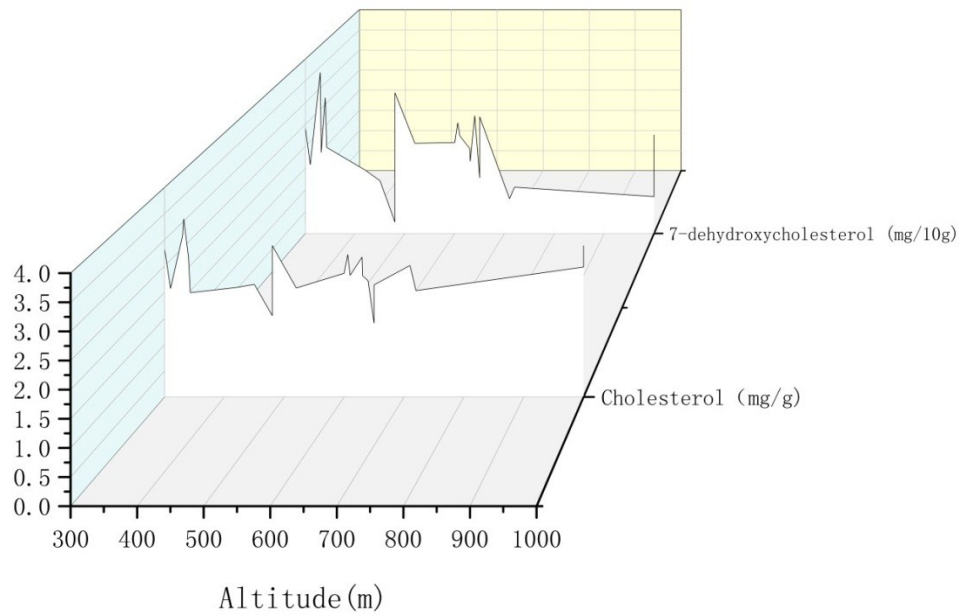

Figure S1: Relationship diagrams between altitude and contents

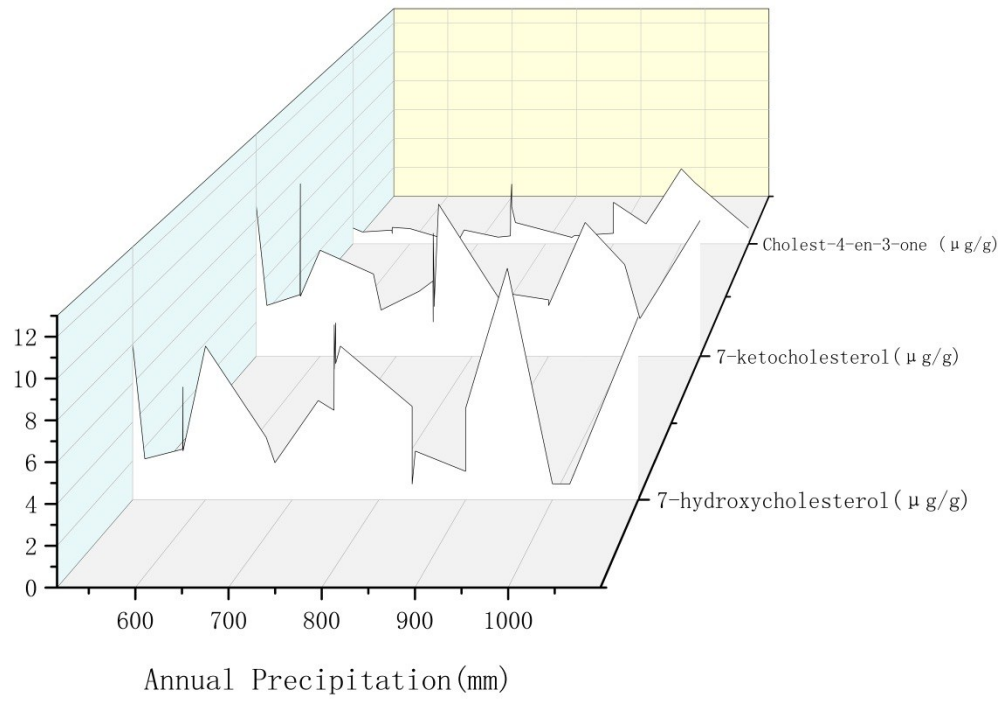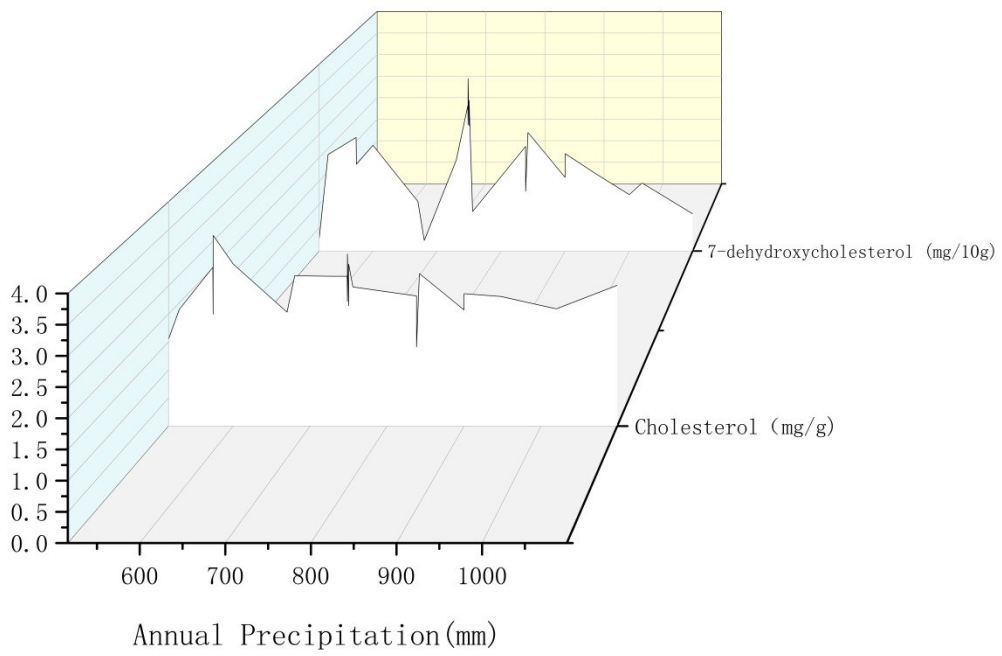

Figure S2: Relationship diagrams between annual precipitation and contents

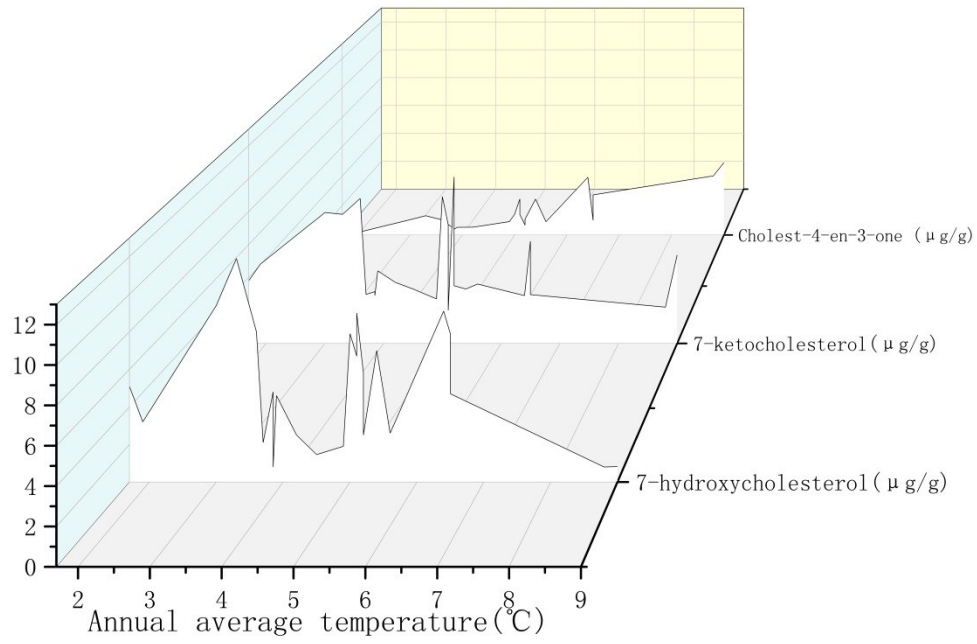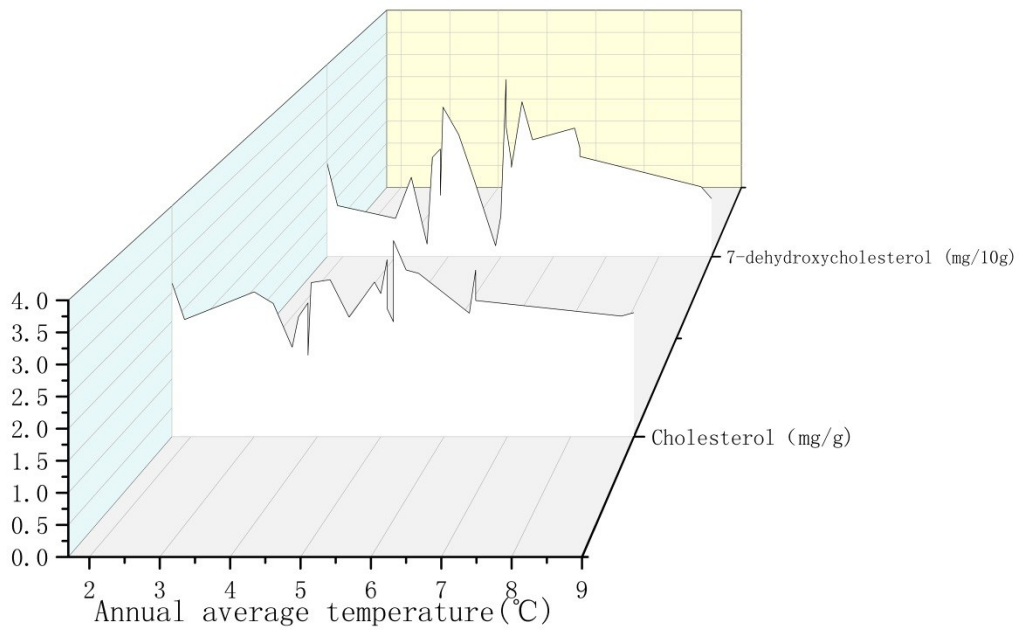

Figure S3: Relationship diagrams between annual average temperature and contents

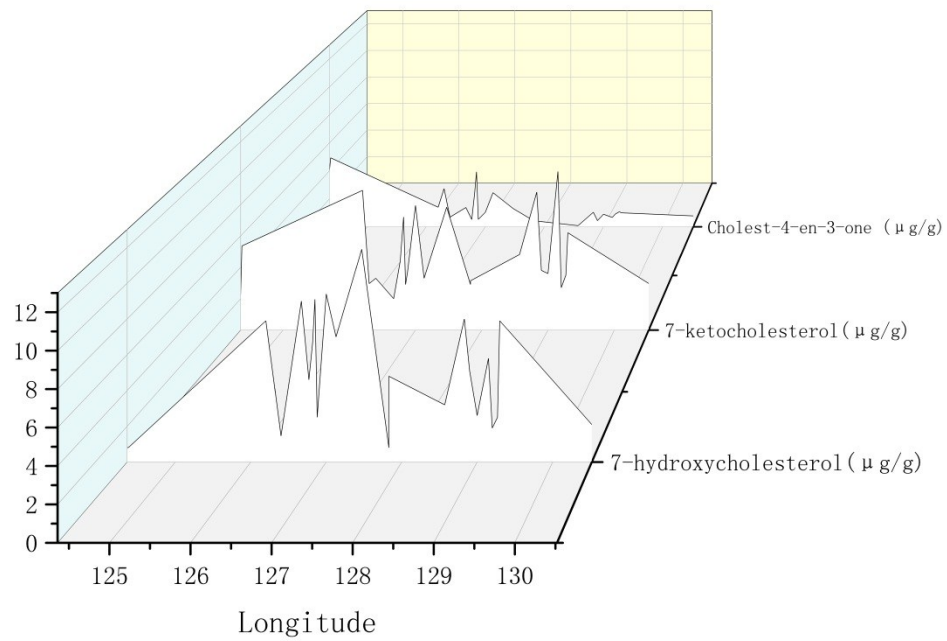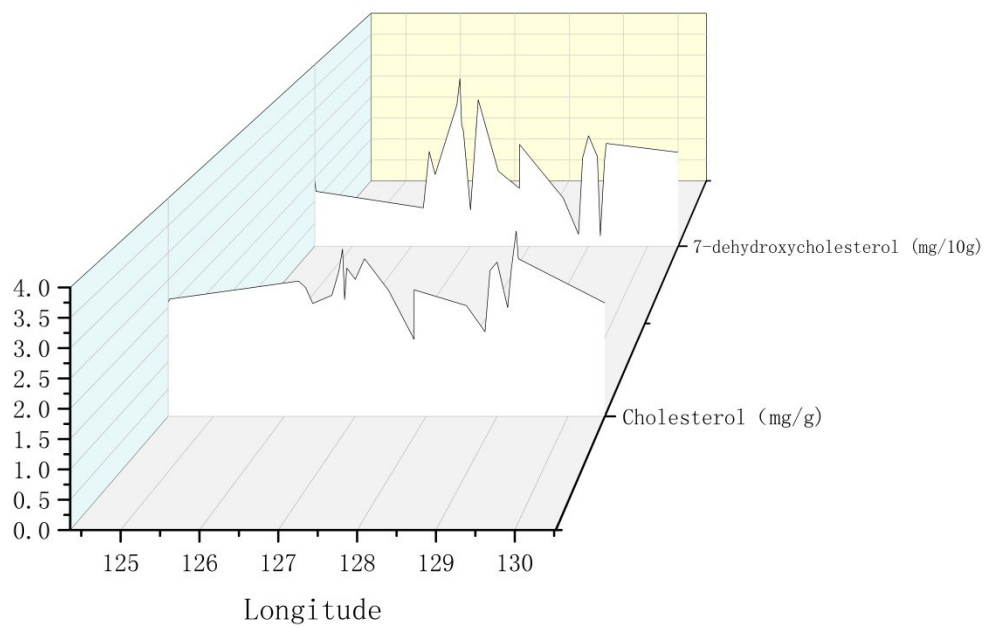

Figure S4: Relationship diagrams between longitude and contents

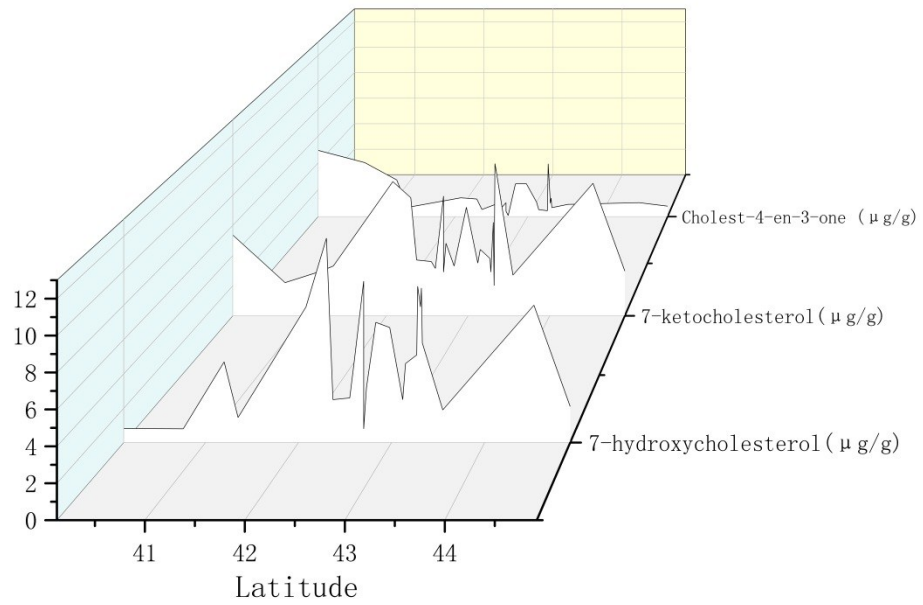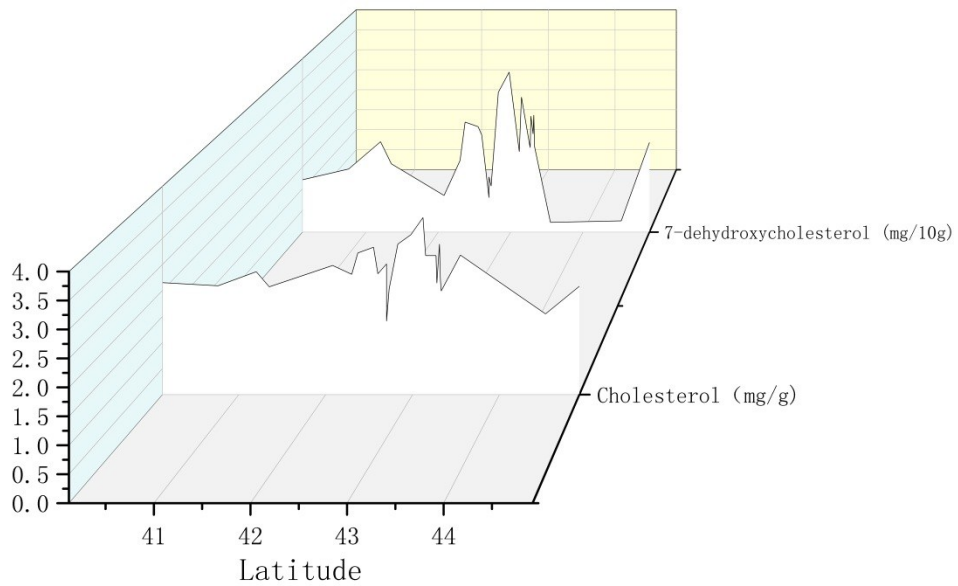

Figure S5: Relationship diagrams between latitude and contents

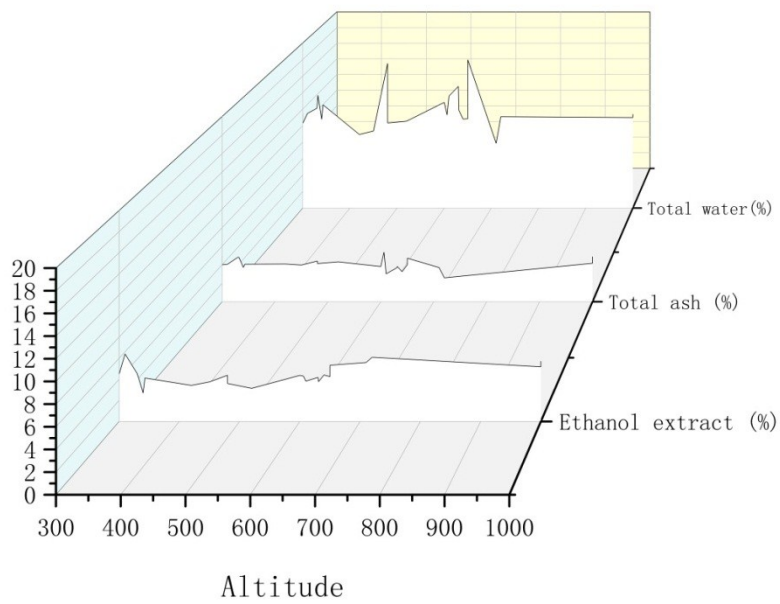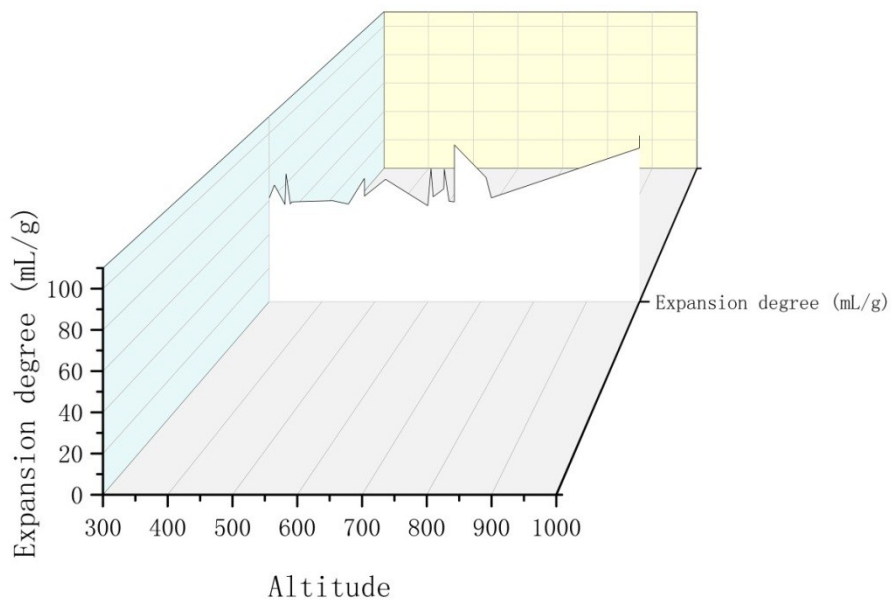

Figure S6: Relationship diagrams between altitude and physicochemical analysis

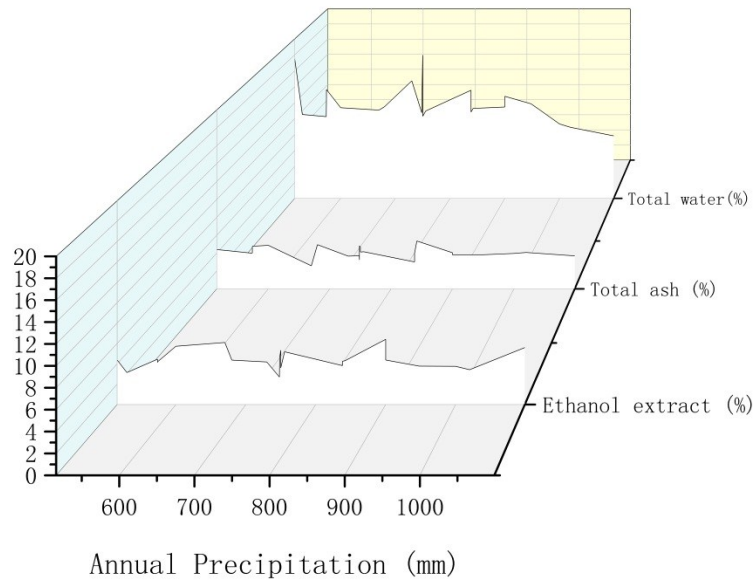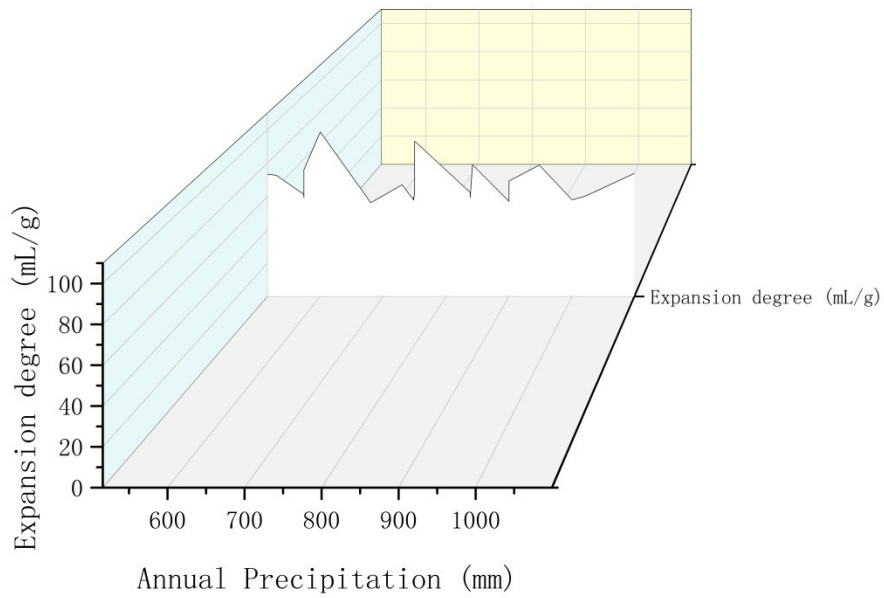

Figure S7: Relationship diagrams between annual precipitation and physicochemical analysis



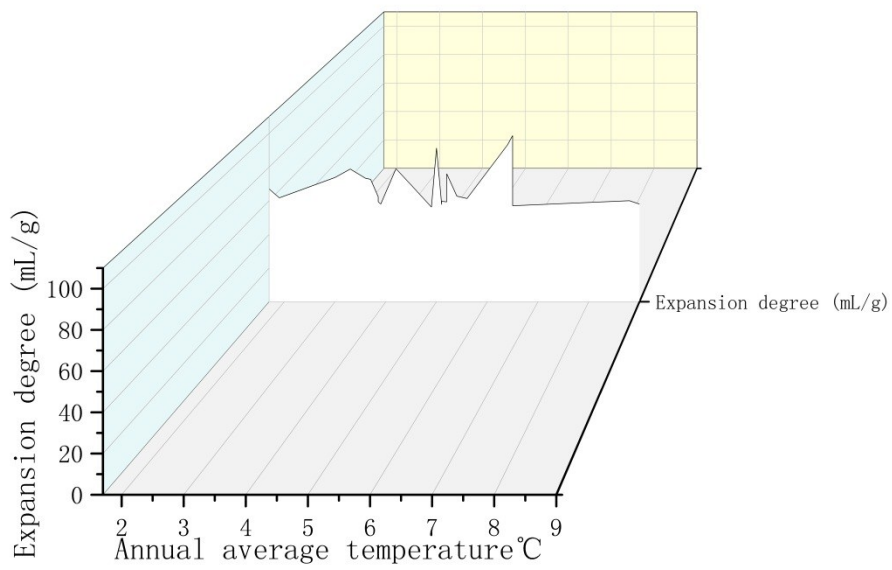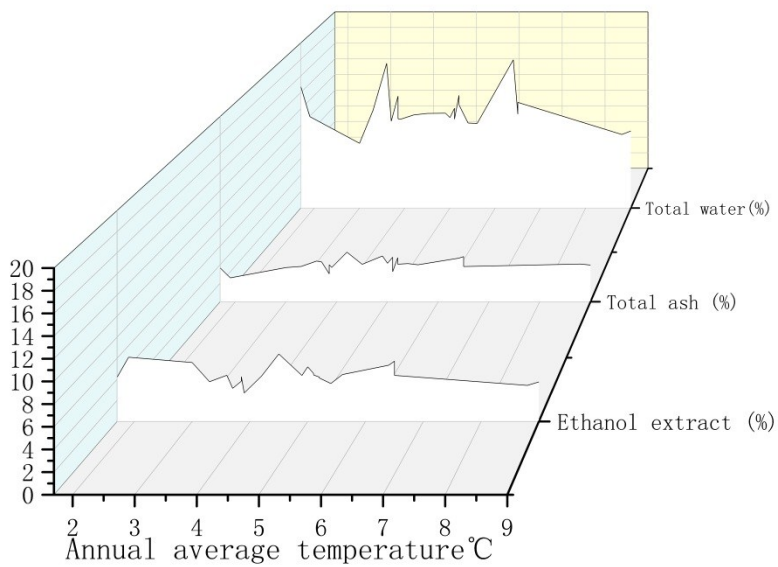

Figure S8: Relationship diagrams between annual average temperature and physicochemical analysis

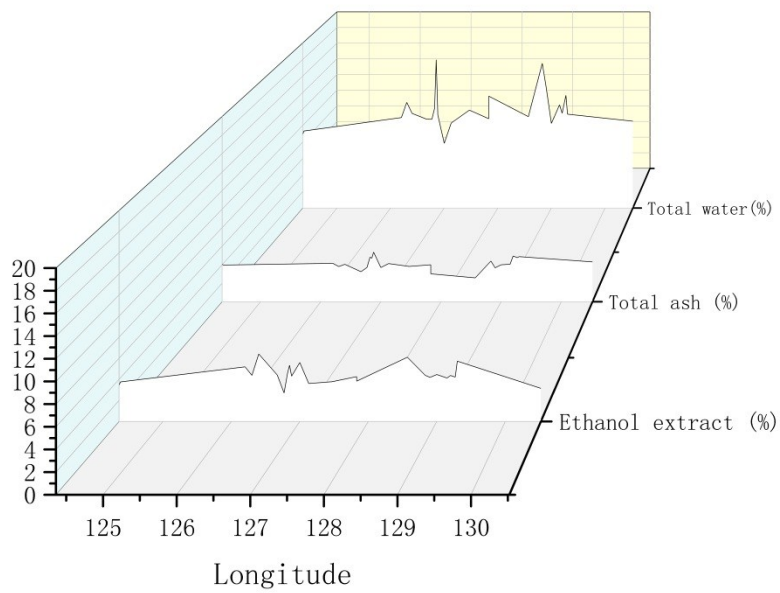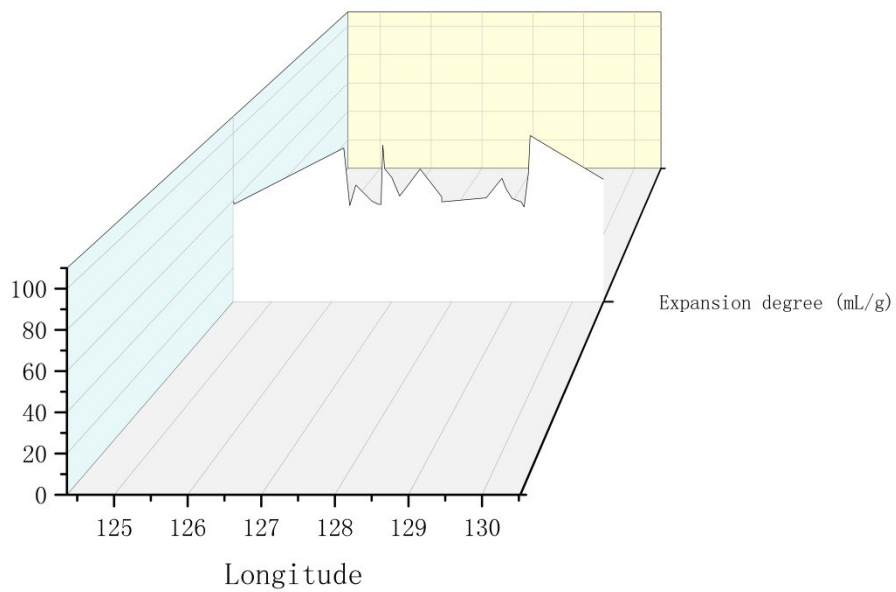

Figure S9: Relationship diagrams between longitude and physicochemical analysis

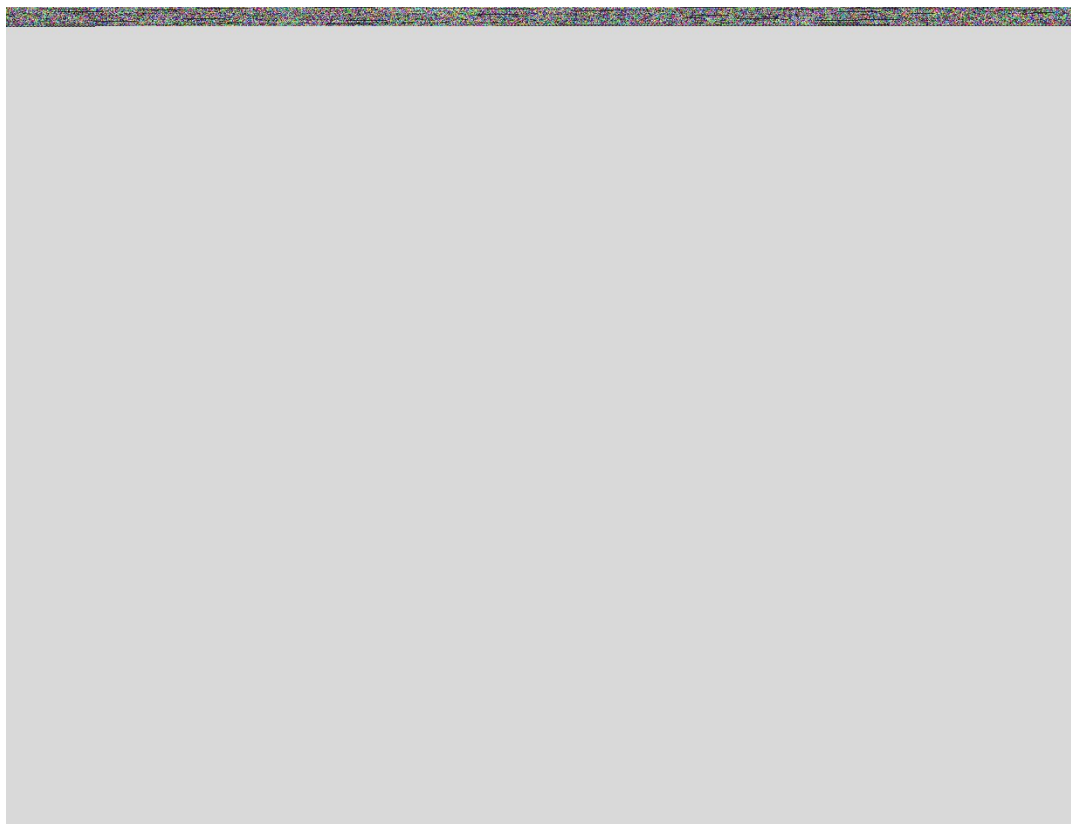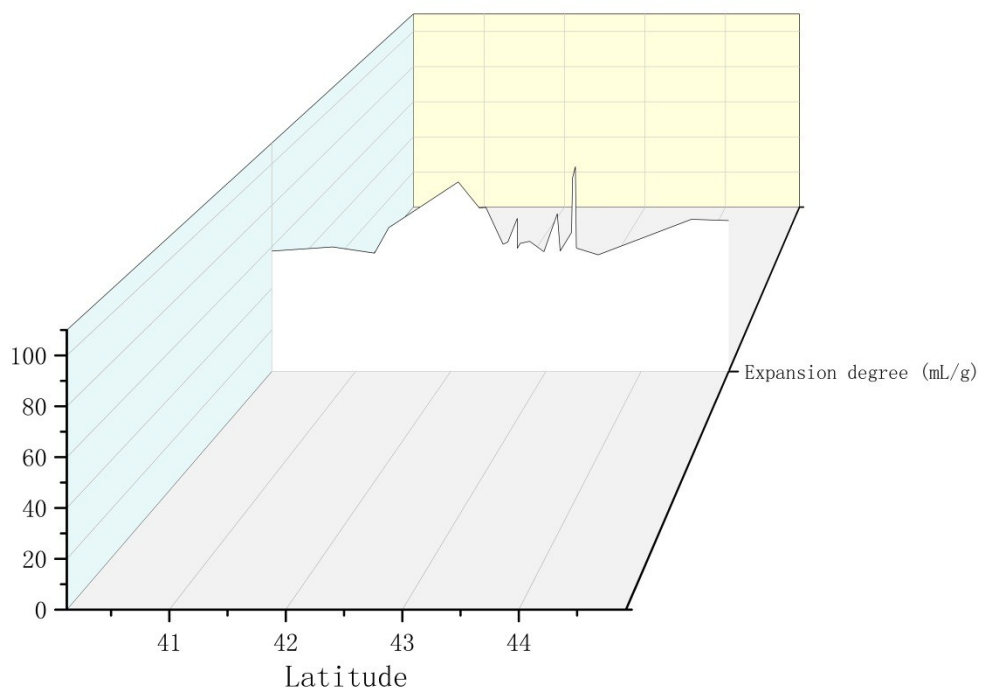

Figure S10: Relationship diagrams between latitude and physicochemical analysis
